# Supplementary material for: The role of water in the formation of crystal structures: a case study of valnemulin hydrochloride
Source: Royal Society of Chemistry journal article supplement (doi:10.1039/d0ce01459a), 2020-11-16
Supplement: d0ce01459a1.pdf [file d0ce01459a1.pdf]

Supporting Information for  
**The role of water in the formation of crystal structure: a case study of  
valnemulin hydrochloride**

Shuyu Li,<sup>a</sup> Ting Wang,<sup>a,b\*</sup> Xin Huang,<sup>a,b</sup> Lina Zhou,<sup>a,b</sup> Mingyu Chen,<sup>a</sup> Wanying Liu,<sup>a</sup> Xiunan Zhang,<sup>a</sup> Yuyuan Dong,<sup>a</sup> and Hongxun Hao<sup>a,b,c\*</sup>

<sup>a</sup>National Engineering Research Center of Industrial Crystallization Technology, School of Chemical Engineering and Technology, Tianjin University, Tianjin, 300072, China, and <sup>b</sup>State Key Laboratory of Chemical Engineering, Tianjin University, Tianjin 30072, China, and <sup>c</sup>School of Chemical Engineering and Technology, Hainan University, Haikou 570208, China

\*Correspondence e-mail: hongxunhao@tju.edu.cn

**Preparation of VHWE and VHWMS**

VHWES and VHWMS were prepared by the method of Ouyang et al<sup>1</sup>. First, about 5 g of the raw material, amorphous VH, was dissolved in 10 mL of an ethanol + water mixture (molar ratio of 1 : 1) and a methanol + water mixture (molar ratio of 1 : 1) at 323.15 K, respectively. After a transparent solution was obtained, the solution was then cooled to 278.15 K at a cooling rate of 0.2 K min<sup>-1</sup> and a lot of crystals emerged during the cooling process by immersing an ultrasound probe. Finally, after the system reached equilibrium for enough time, the products were then filtered and dried in a vacuum oven at 298.15 K

**Preparation of VHW**

VHW is obtained by the transformation of VHWES. At a temperature of 5 °C, VHW can be obtained by suspending 1g VHWES in the aqueous solution of 2ml for 8 hours. The products were then filtered and dried in a vacuum oven at 303.15 K

**The preparation of single crystals of VHW.**

Certain amounts of VH solids were dissolved into water. Then, the suspension was filtered after reaching equilibrium. The beaker with solution was placed into an oven and kept at 298.15 K. The solvent evaporated slowly then VHW with appropriate size for single crystal X-ray diffraction were obtained after several weeks.

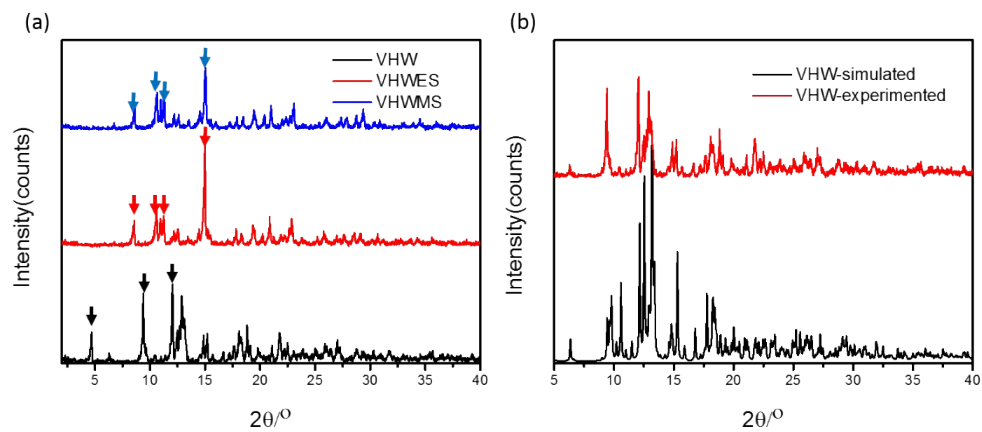

Fig.S1 (a) PXRD patterns of three crystal forms of valnemulin hydrochloride. (b) The XRD pattern of VHW experimental sample and simulated XRD pattern of VHW single Crystal.

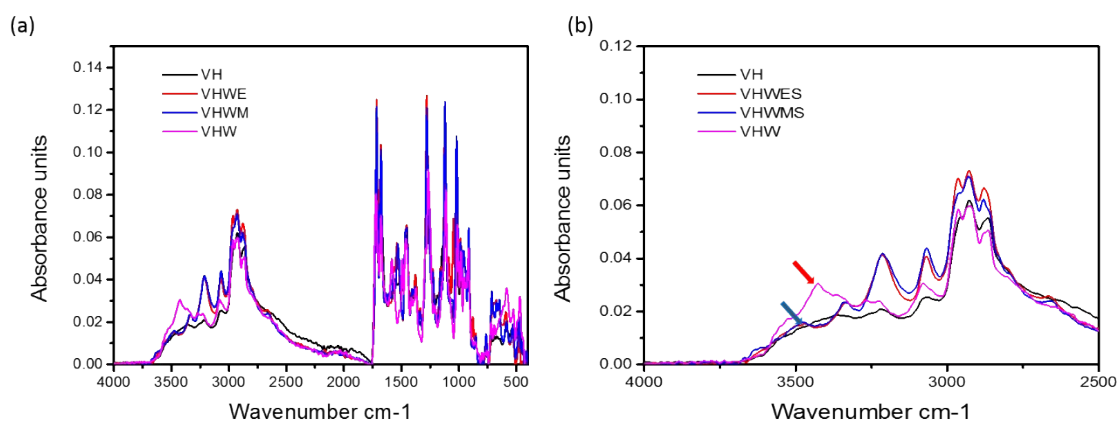

Fig. S2 (a) FTIR spectra of VH, VHWES, VHWMS and VHW. (b) An enlarged view of Fig. S2a (the wavenumber range is 4000-2500) . The peak indicated by the blue arrow corresponds to the water molecule -OH stretching vibration of the two solvates, while the peak indicated by the red arrow corresponds to the water molecule -OH stretching vibration of VHW.

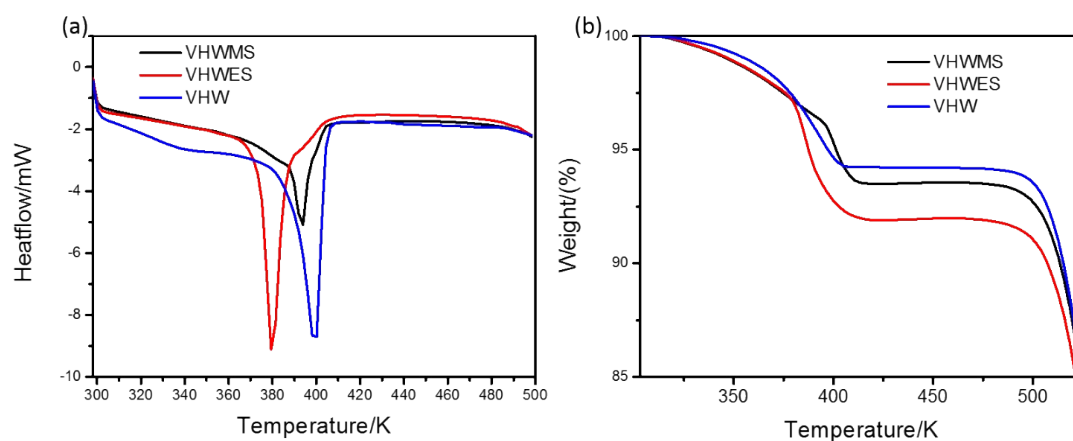

Fig. S3 (a) DSC and (b) TG thermograms of VHW, VHWES and VHWMS.

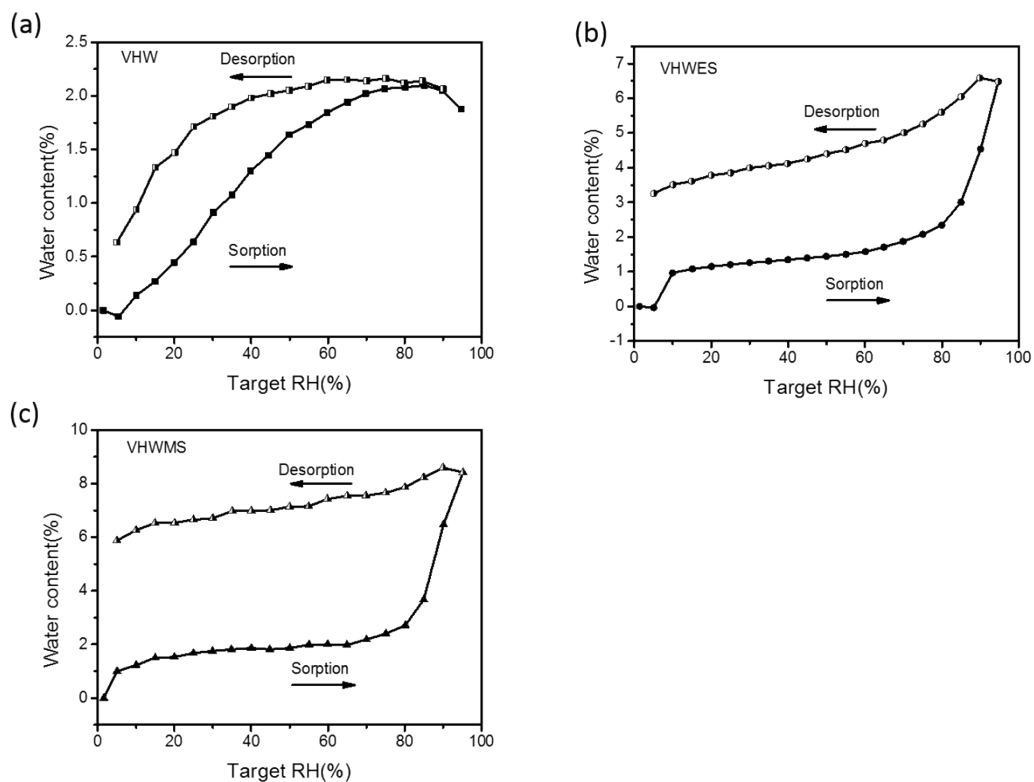

Fig. S4 DVS diagrams of three solid forms of valnemulin hydrochloride: (a) VHW, (b) VHWES, (c) VHWMS.

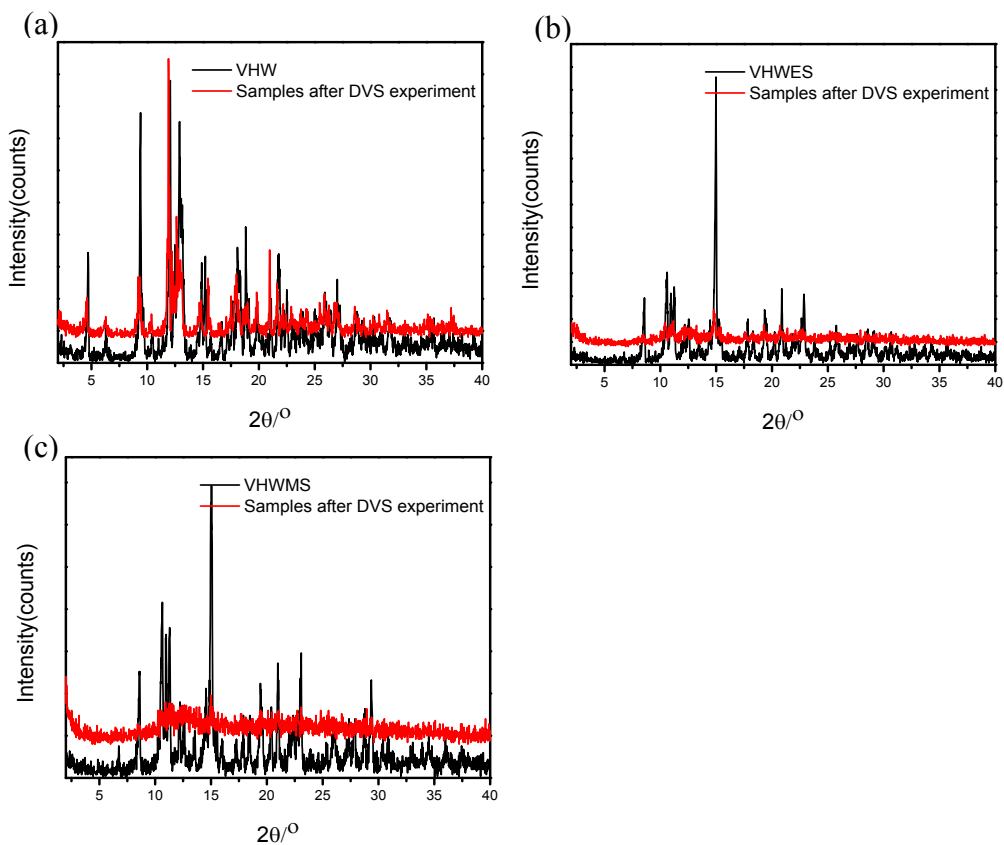

Fig. S5 Comparison between the sample after DVS experiment and its initial sample

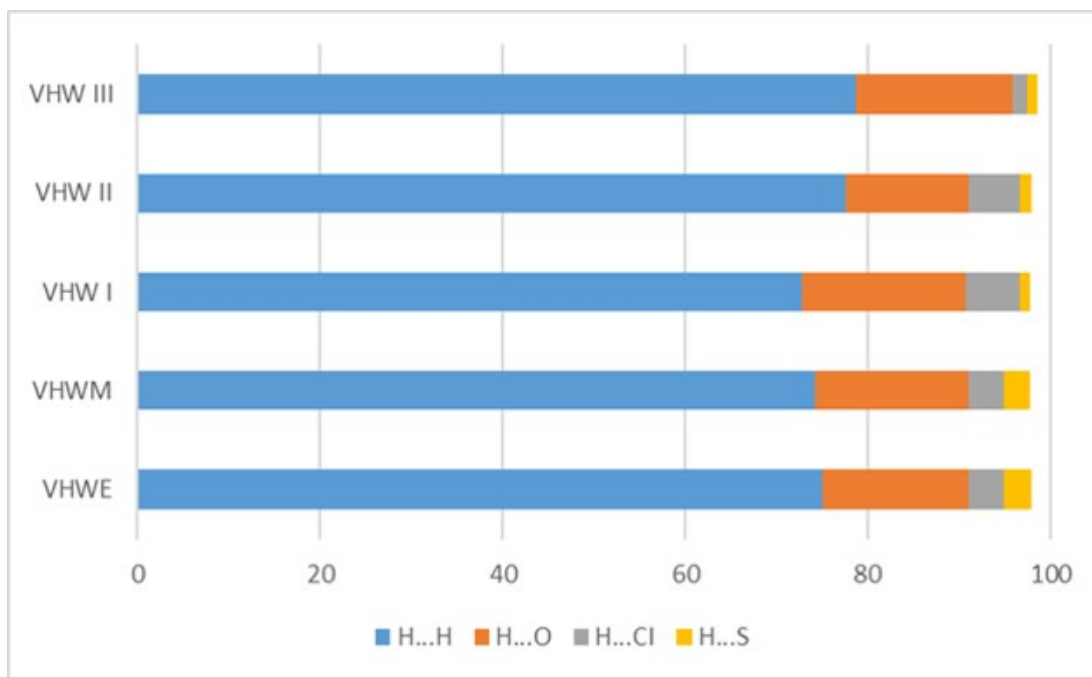

Fig. S6 The relative contribution of different interactions to the Hirshfeld surface.

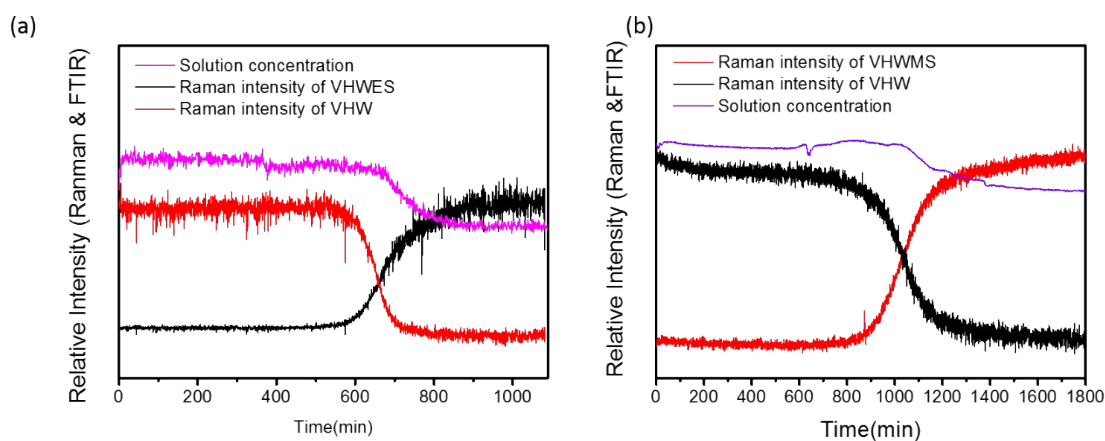

Fig. S7 The solvent-mediated crystallization process of (a) VHW to VHWES in ethanol+water mixed solution and (b) VHW to VHWES in methanol+water mixed solution.

Table S1. Hydrogen Bond Data for three Solid Forms of valnemulin hydrochloride

| Form  | D-H...A           | D-H (Å) | H...A (Å) | D...A (Å) | $\theta(\text{DHA})$ (°) |
|-------|-------------------|---------|-----------|-----------|--------------------------|
| VHWES | O(2)–H(2)···O(5)  | 0.84    | 2.019     | 2.748     | 144.65                   |
|       | O(7)–H(7B)···O(1) | 0.867   | 2.001     | 2.770     | 147.22                   |
|       | N(2)–H(2A)···O(7) | 0.909   | 1.881     | 2.770     | 165.61                   |
|       | N(2)–H(2B)···O(2) | 0.918   | 1.952     | 2.828     | 158.82                   |

|       |                      |       |       |       |        |
|-------|----------------------|-------|-------|-------|--------|
|       | N(2)-H(2C)···O(6)    | 0.923 | 1.881 | 2.747 | 155.45 |
|       | O(6)-H(6)···Cl(1)    | 0.840 | 2.231 | 3.054 | 166.65 |
|       | O(7)-H(7A)···Cl(1)   | 0.862 | 2.315 | 3.147 | 162.28 |
|       | N(1)-H(1)···Cl(1)    | 0.898 | 2.354 | 3.208 | 158.84 |
| VHWMS | O(5)-H(5)···O(1)     | 0.840 | 2.043 | 2.783 | 146.61 |
|       | N(1)-H(1A)···O(5)    | 0.898 | 1.985 | 2.856 | 162.76 |
|       | N(1)-H(1B)···O(7)    | 0.900 | 1.917 | 2.787 | 162.05 |
|       | N(2)-H(2)···Cl(1)    | 0.912 | 2.316 | 3.207 | 165.57 |
|       | N(1)-H(1C)···O(6)    | 0.917 | 1.871 | 2.774 | 167.59 |
|       | O(6)-H(6)···Cl(1)    | 0.840 | 2.243 | 3.062 | 164.82 |
|       | O(7)-H(7A)···Cl(1)   | 0.894 | 2.322 | 3.149 | 153.85 |
|       | O(7)-H(7B)···O(4)    | 0.892 | 2.382 | 2.910 | 118.01 |
| VHW   | N6-H(6C)···Cl(3)     | 0.911 | 2.341 | 3.220 | 162.06 |
|       | N6-H(6B)···O(19)     | 0.910 | 1.962 | 2.854 | 166.38 |
|       | N1-H(1C)···O(5)      | 0.910 | 2.057 | 2.743 | 131.16 |
|       | N5-H(5)···O(20)      | 0.880 | 1.917 | 2.786 | 169.20 |
|       | O(20)-H···O(4)       | 0.851 | 2.614 | 2.735 | 89.05  |
|       | O(16)-H(16B)···O(2)  | 0.849 | 2.408 | 2.911 | 118.47 |
|       | O(2)-H(2A)···Cl(2)   | 0.840 | 3.029 | 3.130 | 89.03  |
|       | N(4A)-H(4AB)···Cl(2) | 0.911 | 2.216 | 3.102 | 156.38 |
|       | N(4A)-H(4AC)···Cl(1) | 0.910 | 2.299 | 3.126 | 150.91 |
|       | O(17)-H(17B)···O(7)  | 0.850 | 2.154 | 2.931 | 151.76 |
|       | O(7)-H(7)···O(18)    | 0.84  | 1.847 | 2.701 | 167.84 |
|       | N(1)-H(1A)···O(16)   | 0.910 | 1.979 | 2.861 | 162.63 |
|       | N(1)-H(1B)···Cl(1)   | 0.909 | 2.715 | 3.060 | 164.25 |
|       | N(2)-H(2)···O(17)    | 0.880 | 2.153 | 3.021 | 168.66 |
|       | O19-H(19B)···O(16)   | 0.850 | 2.818 | 2.962 | 91.32  |
|       | O19-H(19A)···O(17)   | 0.850 | 2.215 | 2.853 | 131.80 |
|       | O(17)-H(17A)···Cl(2) | 0.850 | 2.341 | 3.155 | 160.38 |

|                       |       |       |       |        |
|-----------------------|-------|-------|-------|--------|
| O(16)-H(16A)···Cl(3)  | 0.850 | 2.218 | 3.043 | 163.78 |
| O(18)-H(18A)···Cl(2)  | 0.850 | 2.647 | 3.133 | 117.64 |
| O(20)-H(20B)···Cl(1)  | 0.851 | 2.422 | 3.239 | 161.27 |
| N(4A)-H(4AA)···O(21A) | 0.907 | 2.353 | 3.200 | 155.41 |

Table S2 The influence of experimental conditions on the crystal formation of VH

| Experiment | Temperature<br>°C | Amount of<br>VH<br>g/ml | Stirring<br>rate<br>rpm | Solvent  | results         |
|------------|-------------------|-------------------------|-------------------------|----------|-----------------|
| 1          | 5                 | 0.2                     | 100                     | Ethanol  | sticky solution |
| 2          | 5                 | 0.3                     | 100                     | Ethanol  | sticky solution |
| 3          | 5                 | 0.4                     | 100                     | Ethanol  | sticky solution |
| 4          | 5                 | 0.4                     | 50                      | Ethanol  | sticky solution |
| 5          | 5                 | 0.4                     | 150                     | Ethanol  | sticky solution |
| 6          | 25                | 0.6                     | 100                     | Ethanol  | sticky solution |
| 7          | 5                 | 0.2                     | 100                     | Methanol | sticky solution |
| 8          | 5                 | 0.3                     | 100                     | Methanol | sticky solution |
| 9          | 5                 | 0.4                     | 100                     | Methanol | sticky solution |
| 10         | 5                 | 0.4                     | 50                      | Methanol | sticky solution |
| 11         | 5                 | 0.4                     | 150                     | Methanol | sticky solution |
| 12         | 25                | 0.6                     | 100                     | Methanol | sticky solution |

Table S3 The influence of experimental conditions on solution-mediated polymorphic transformations

| Experiment | Temperature<br>°C | Supersaturation | Stirring<br>rate<br>rpm | Solvent            | results |
|------------|-------------------|-----------------|-------------------------|--------------------|---------|
| 1          | 5                 | 1.7             | 100                     | Ethanol+Water(1:1) | VHWES   |
| 2          | 5                 | 1.5             | 100                     | Ethanol+Water(1:1) | VHWES   |
| 3          | 5                 | 1.9             | 100                     | Ethanol+Water(1:1) | VHWES   |
| 4          | 5                 | 1.5             | 50                      | Ethanol+Water(1:1) | VHWES   |

---

|    |    |     |     |                     |       |
|----|----|-----|-----|---------------------|-------|
| 5  | 5  | 1.5 | 150 | Ethanol+Water(1:1)  | VHWES |
| 6  | 25 | 1.1 | 100 | Ethanol+Water(1:1)  | VHWES |
| 7  | 5  | 1.7 | 100 | Methanol+Water(1:1) | VHWMS |
| 8  | 5  | 1.5 | 100 | Methanol+Water(1:1) | VHWMS |
| 9  | 5  | 1.9 | 100 | Methanol+Water(1:1) | VHWMS |
| 10 | 5  | 1.5 | 50  | Methanol+Water(1:1) | VHWMS |
| 11 | 5  | 1.5 | 150 | Methanol+Water(1:1) | VHWMS |
| 12 | 25 | 1.1 | 100 | Methanol+Water(1:1) | VHWMS |

---

1. J. Ouyang, B. Na, L. Zhou, S. Xiao, G. Xiong and T. Jin, *CrystEngComm*, 2018, **20**, 563-569.
